# Supplementary material for: Inflammation is a target of medical treatment for lower urinary tract symptoms associated with benign prostatic hyperplasia
Source: PubMed Central journal article supplement (PMC7644532; doi:10.1007/s00345-020-03106-1), 2020-02-14
Supplement: 345_2020_3106_MOESM1_ESM.pdf [file 345_2020_3106_MOESM1_ESM.pdf]

**Inflammation is a target of medical treatment for lower urinary tract symptoms associated with benign prostatic hyperplasia**

World Journal of Urology

Cosimo De Nunzio<sup>a</sup>, Andrea Salonia<sup>b,c</sup>, Mauro Gacci<sup>d</sup>, Vincenzo Ficarra<sup>e</sup>

a) Sant'Andrea Hospital, Sapienza University of Rome, Department of Urology, Rome, Italy

b) University Vita-Salute San Raffaele, Milan, Italy

c) Division of Experimental Oncology/Unit of Urology; URI; IRCCS Ospedale San Raffaele, Milan, Italy

d) Minimally Invasive and Robotic Surgery, and Kidney Transplantation, University of Florence AOUC-Careggi Hospital, Florence, Italy

e) Department of Human and Pediatric Pathology "Gaetano Barresi", Urologic Section, University of Messina, Messina, Italy

Corresponding author: Vincenzo Ficarra [vficarra@unime.it](mailto:vficarra@unime.it)

**Online Resource 1:** Literature searches performed in PubMed in July 2019

| <b>Search terms</b>                                                     | <b>Limitations</b>                                  | <b># of records</b> |
|-------------------------------------------------------------------------|-----------------------------------------------------|---------------------|
| (Prostatic hyperplasia (Mesh)) AND (Prostatitis (Mesh) OR inflammation) | English language, Abstract available, Humans, Title | 348                 |
| "(prostate OR prostatic) inflammation" AND serenoa                      |                                                     | 24                  |
| "(prostate OR prostatic) inflammation" AND tamsulosin                   |                                                     | 14                  |
| "(prostate OR prostatic) inflammation" AND alfuzosin                    |                                                     | 6                   |
| "(prostate OR prostatic) inflammation" AND doxazosin                    |                                                     | 6                   |
| "(prostate OR prostatic) inflammation" AND terazosin                    |                                                     | 6                   |
| "(prostate OR prostatic) inflammation" AND silodosin                    |                                                     | 3                   |
| "(prostate OR prostatic) inflammation" AND naftopidil                   |                                                     | 1                   |
| "(prostate OR prostatic) inflammation" AND finasteride                  |                                                     | 37                  |
| "(prostate OR prostatic) inflammation" AND dutasteride                  |                                                     | 20                  |
| "(prostate OR prostatic) inflammation" AND tadalafil                    |                                                     | 11                  |
| "serenoa repens" AND ("benign prostatic hyperplasia" OR "BPH")          |                                                     | 157                 |
| "serenoa" AND "tamsulosin"                                              |                                                     | 27                  |
| "serenoa" AND "alfuzosin"                                               |                                                     | 6                   |
| "serenoa" AND "terazosin"                                               |                                                     | 3                   |
| "serenoa" AND "doxazosin"                                               |                                                     | 2                   |
| "serenoa" AND "silodosin"                                               |                                                     | 1                   |
| "serenoa" AND "naftopidil"                                              |                                                     | 0                   |
| serenoa AND finasteride AND ("benign prostatic hyperplasia" OR "BPH")   |                                                     | 31                  |
| serenoa AND dutasteride AND ("benign prostatic hyperplasia" OR "BPH")   |                                                     | 4                   |
